# Supplementary material
Source: publisher figshare collection journal article supplement (https://acs.figshare.com/ndownloader/files/21659808)
Supplement: Supplementary file 1 [file 21659808]

# Supporting Information

## Efficient Site-Specific Prokaryotic and Eukaryotic Incorporation of Halotyrosine Amino Acids into Proteins

**Hyo Sang Jang<sup>1</sup>, Xiaodong Gu<sup>2</sup>, Richard B. Cooley<sup>1</sup>, Joseph J. Porter<sup>1</sup>, Rachel L. Henson<sup>1</sup>, Taylor Willi<sup>1</sup>, Joseph A. DiDonato<sup>2,3</sup>, Stanley L. Hazen<sup>2,3,4,\*</sup>, Ryan A. Mehl<sup>1,\*</sup>**

<sup>1</sup> Department of Biochemistry and Biophysics, Oregon State University, Corvallis, Oregon 97331

<sup>2</sup> Department of Cardiovascular & Metabolic Sciences, Lerner Research Institute, Cleveland Clinic, Cleveland, Ohio 44195

<sup>3</sup> Center for Microbiome & Human Health, Lerner Research Institute, Cleveland Clinic, Cleveland, Ohio 44195

<sup>4</sup> Department of Cardiovascular Medicine, Heart and Vascular Institute, Cleveland Clinic, Cleveland, Ohio 44195

Running title: Genetic incorporation of halotyrosine derivatives into proteins

### Materials included:

Tables S1-S2

Figures S1-S14

Halotyrosine machinery system sequences

**Table S1. Sequences of *M. barkeri* halotyrosine synthetase hits.**

| Mb Pyl RS hit | Leu270     | Tyr271     | Leu274     | Asn311     | Cys313     | Off Site      |
|---------------|------------|------------|------------|------------|------------|---------------|
| D1            | Leu        | Tyr        | Leu        | Ser        | Cys        | I215V / I285V |
| B2            | Leu        | Tyr        | Leu        | Ser        | Cys        |               |
| C2            | Leu        | Tyr        | Leu        | Ser        | Ala        |               |
| B3            | Phe        | Tyr        | Leu        | Ser        | Cys        | E330G         |
| E3            | Leu        | Tyr        | Leu        | Ser        | Cys        | N401T         |
| H3            | Leu        | Tyr        | Leu        | Cys        | Ala        |               |
| A4            | Leu        | Tyr        | Leu        | Ser        | Ser        |               |
| D4            | Leu        | Tyr        | Leu        | Cys        | Cys        |               |
| E4            | Phe        | Tyr        | Leu        | Cys        | Cys        | T269A         |
| F4            | Leu        | Tyr        | Leu        | Ser        | Ser        |               |
| G4            | Leu        | Tyr        | Leu        | Cys        | Ser        |               |
| C5            | Leu        | Tyr        | Leu        | Gly        | Ser        |               |
| B6            | Gln        | Tyr        | Leu        | Gly        | Thr        |               |
| <b>C6</b>     | <b>Ser</b> | <b>Leu</b> | <b>Leu</b> | <b>Gly</b> | <b>Thr</b> |               |
| E6            | Leu        | Tyr        | Leu        | Gly        | Thr        |               |

**Table S2. DNA oligomers used to construct eukaryotic expression vectors.**

| Primer name | DNA oligo sequence                                                 |
|-------------|--------------------------------------------------------------------|
| JP1         | 5'-TAAACTTgctagcgccGCCACCATGGCGTGTCGGTTCCTTTGCAGTTGCCTCC-3'        |
| JP2         | 5'-ccgcaggtagttGAGTGAggtggggccagGGTaggccgaggcac-3'                 |
| JP3         | 5'-gtgcctgcggcctACCctggccccaccTCACTCaactacctggg-3'                 |
| JP4         | 5'-cagccgctgcccctctgGGTaaaACCcaccattgtaaac-3'                      |
| JP5         | 5'-gtttacaatgtgGGTtttACCcagatgggcagcggctg-3'                       |
| JP6         | 5'-CAGCGGGTTTAAACGGGCCCTCTAGTCATCACAGGTTGGTGCTGATGCCGTTGTAGTAGC-3' |
| JP7         | 5'-CTGTGTGCTAGCgcgcgcaccATGGTTTCTAAAGGTGAAGAACTTTTTACTGG-3'        |
| JP8         | 5'-ctgcaaGAATTCTTAGTGGTGATGGTGGTGATGAGTAGAATCCAGTCCC-3'            |
| JP9         | 5'-TAAACTTgctagcGCCACCATGGCGTGTCGGTTCCTTTGCAGTTGCCTCC-3'           |
| JP10        | 5'-AGTggagaattcTCATCACAGGTTGGTGCTGATGCCGTTGTAGTAGCTCTCGC-3'        |

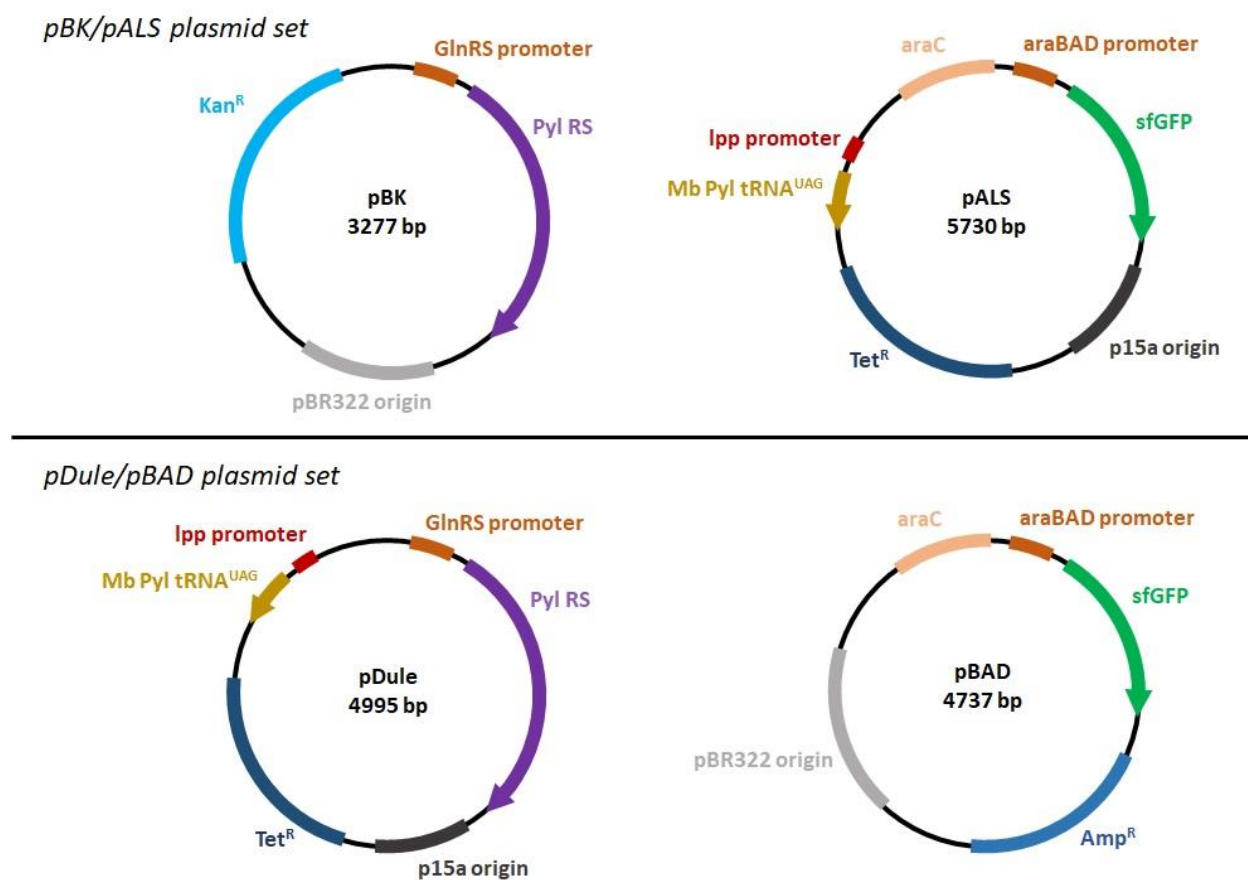

**Figure S1.** Plasmid maps for the two plasmid sets: The pBK/pALS pairing is used in the initial screening of library members. The pDule/pBAD pairing was used for standard halotyrosine protein expression.

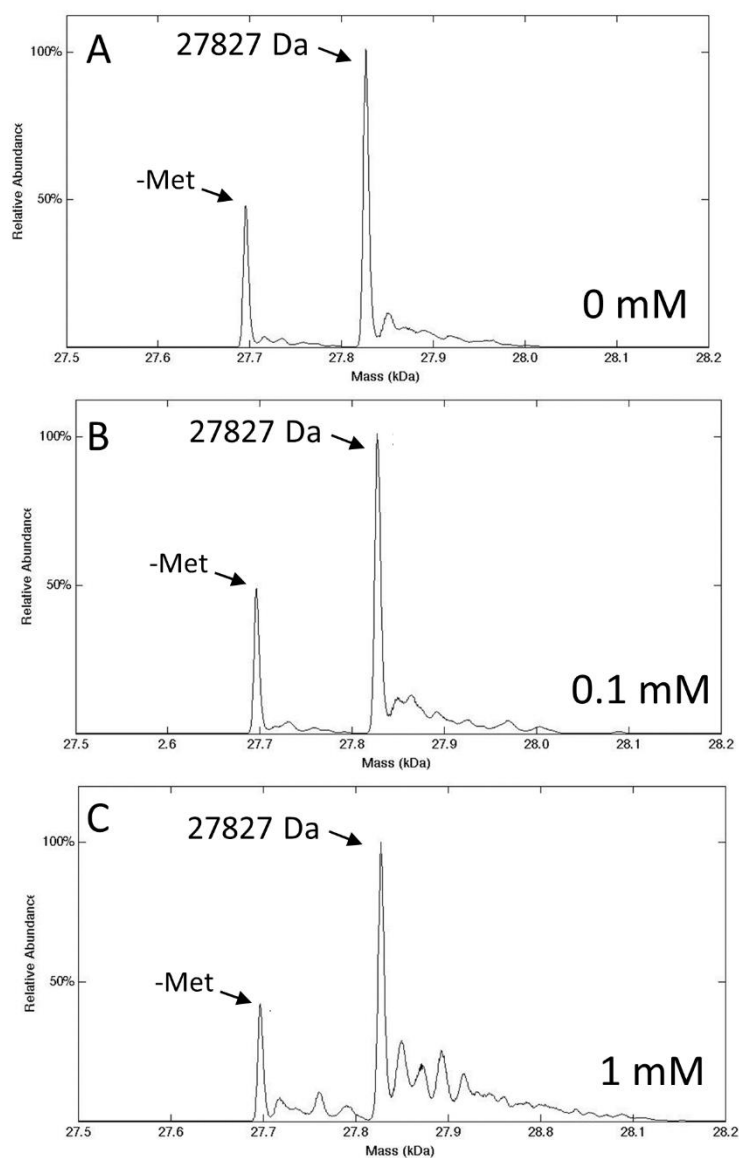

**Figure S2.** ESI-MS spectra of purified wild-type sfGFP expressed in (A) 0 mM, (B) 0.1 mM and (C) 1.0 mM 3-chloroTyr using DH10b cells and 50 mL media in a 250 mL baffled flask.

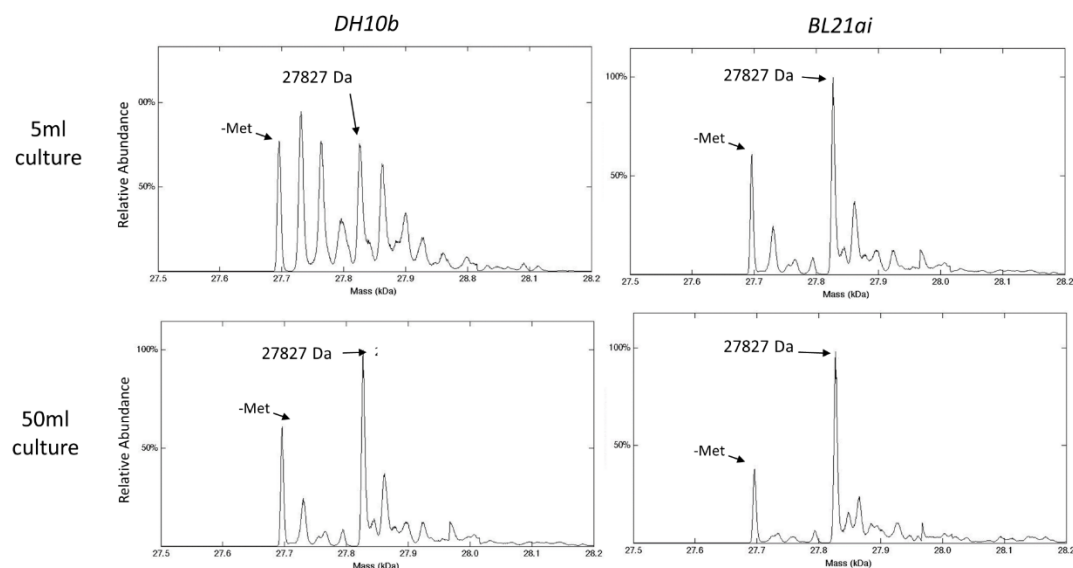

**Figure S3.** Dependence of tyrosine residue specific incorporation of 3-chloroTyr into wild-type sfGFP on culture volume and *E. coli* strain. Left column: DH10b cells, Right column: BL21ai cells. Top row: 5 mL culture volume in a 15 mL culture tube (low aeration), Bottom row: 50 mL cultures in a 250 mL baffled flask (high aeration).

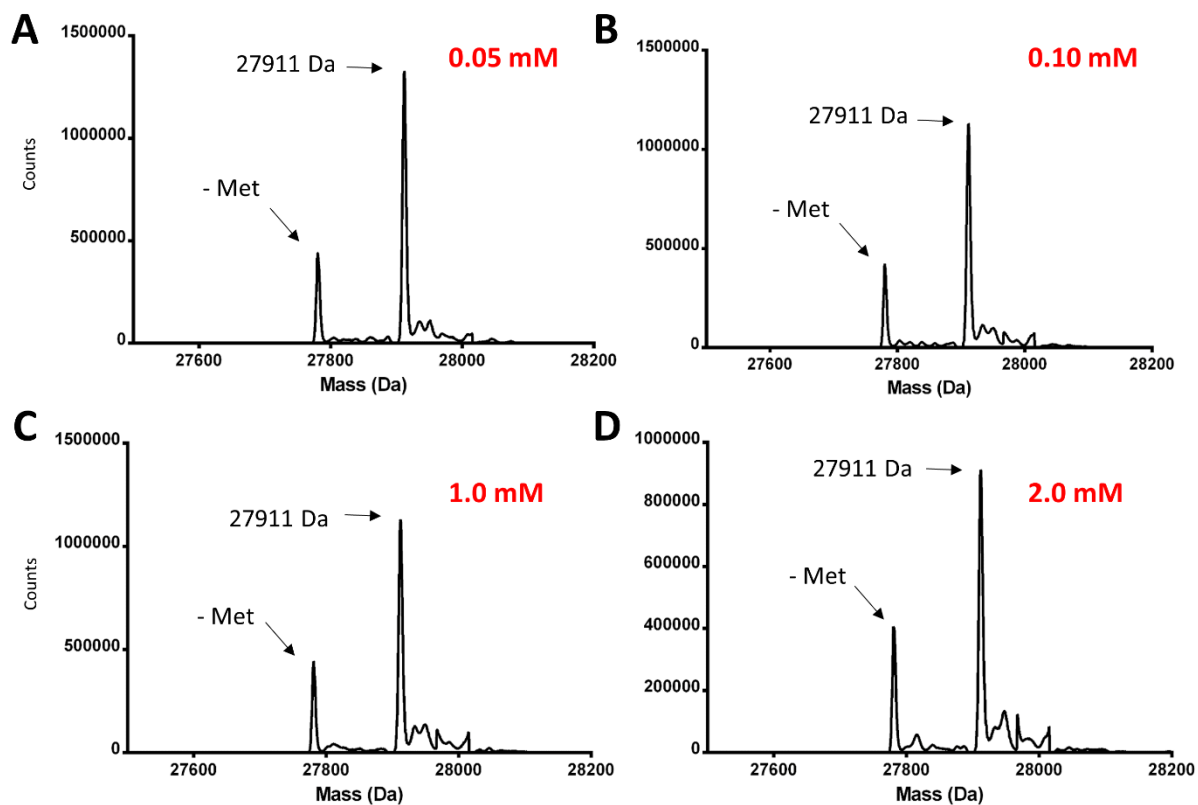

**Figure S4.** Mass spectrometry of sfGFP-150-3-chloroTyr purified from BL21ai cell expression cultures grown at different concentrations of 3-chloroTyr. (A) 0.05 mM 3-chloroTyr, (B) 0.1 mM 3-chloroTyr, (C) 1.0 mM 3-chloroTyr and (D) 2.0 mM 3-chloroTyr in the media.

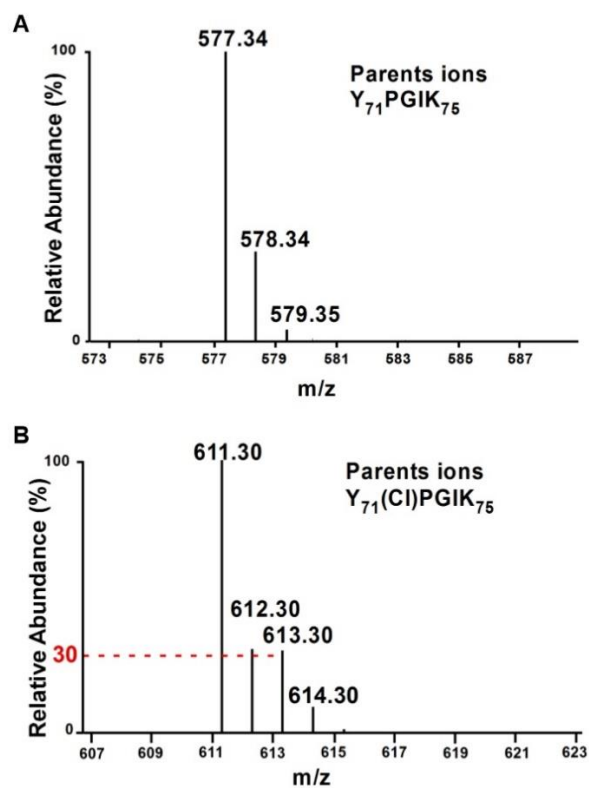

**Figure S5.** MS spectra of purified recombinant PON1 expressed in *E. coli*. Parents ions of peptides YPGIK (A) and  $Y_{71}(Cl)PGIK_{75}$  (B) are shown. m/z 611.30 is the parent ion of  $Y_{71}(^{35}Cl)PGIK_{75}$  and m/z 613.30 is the parent ion of  $Y_{71}(^{37}Cl)PGIK_{75}$ . The ratio of intensities of m/z 611.30 and m/z 613.30 is about 3:1, which is consistent with the natural abundance of  $^{35}Cl$  and  $^{37}Cl$ .

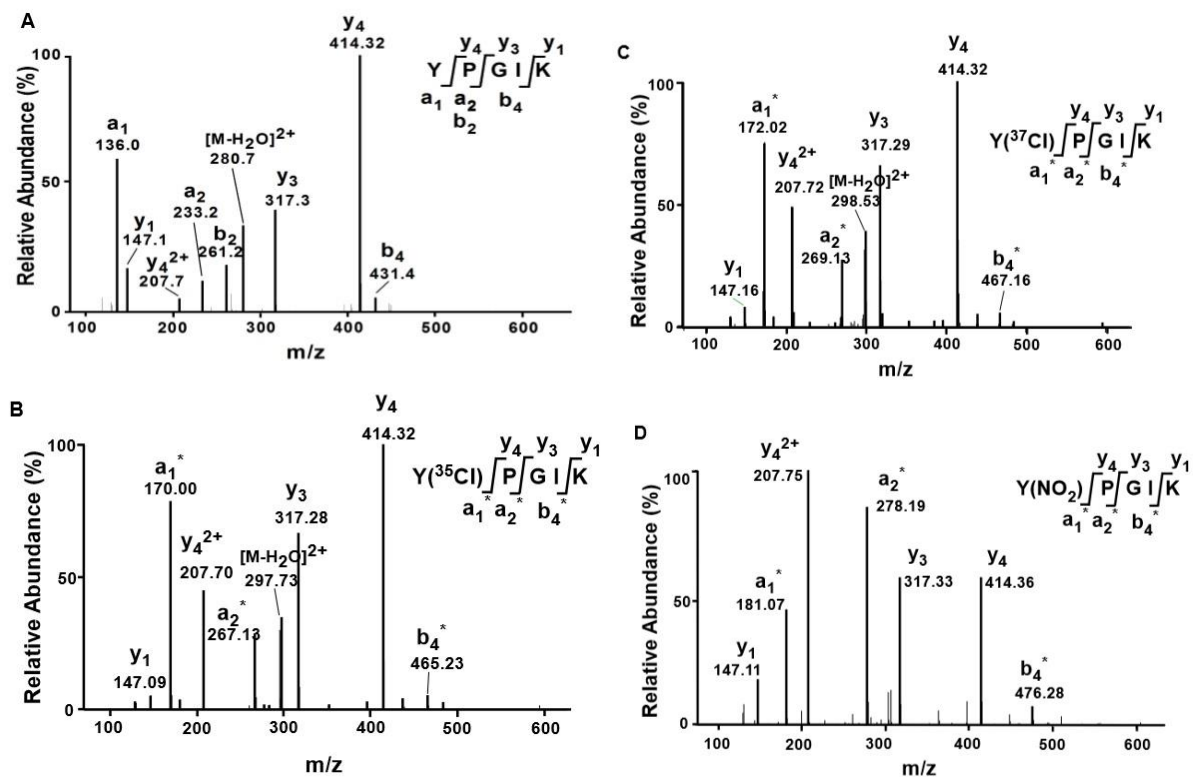

**Figure S6.** MS/MS spectra of purified recombinant PON1 in *E. coli*. (A) MS/MS of Y71PGIK75, (B) Y71( $^{35}\text{Cl}$ )PGIK75, (C) Y71( $^{37}\text{Cl}$ )PGIK75 and (D) Y71( $\text{NO}_2$ )PGIK75



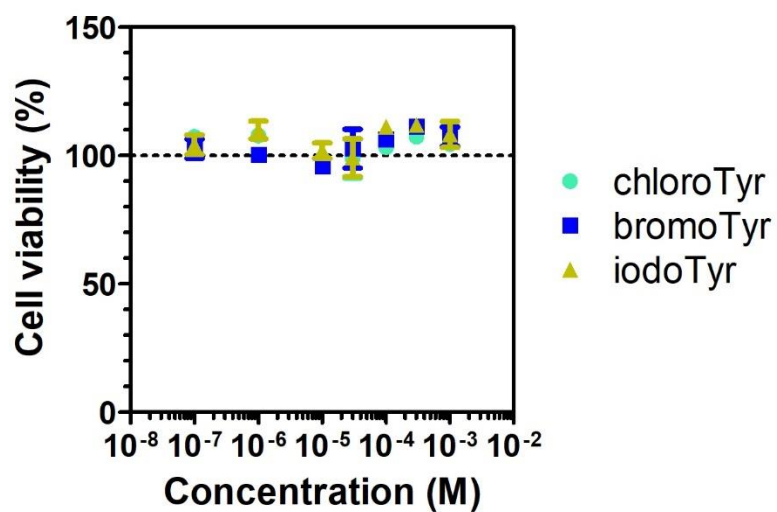

**Figure S7.** The effect of halotyrosine on the viability of HEK293T cells. The viability of HEK293T cells exposed for 48 h to 3-chloroTyr, 3-bromoTyr, or 3-iodoTyr was measured using the CellTiter Glo assay kit.  $n = 3 \pm \text{S.E.M.}$

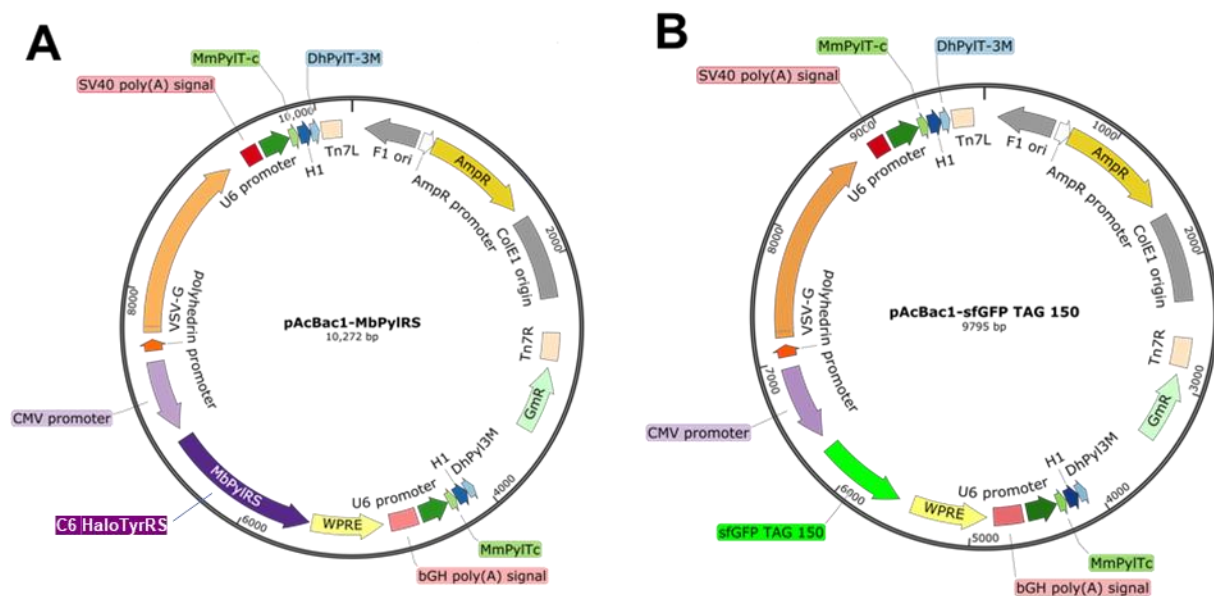

**Figure S8.** pAcBac1 expression vector maps. (A) pAcBac1-HaloTyrRS. (B) pAcBac1-sfGFP-150TAG.

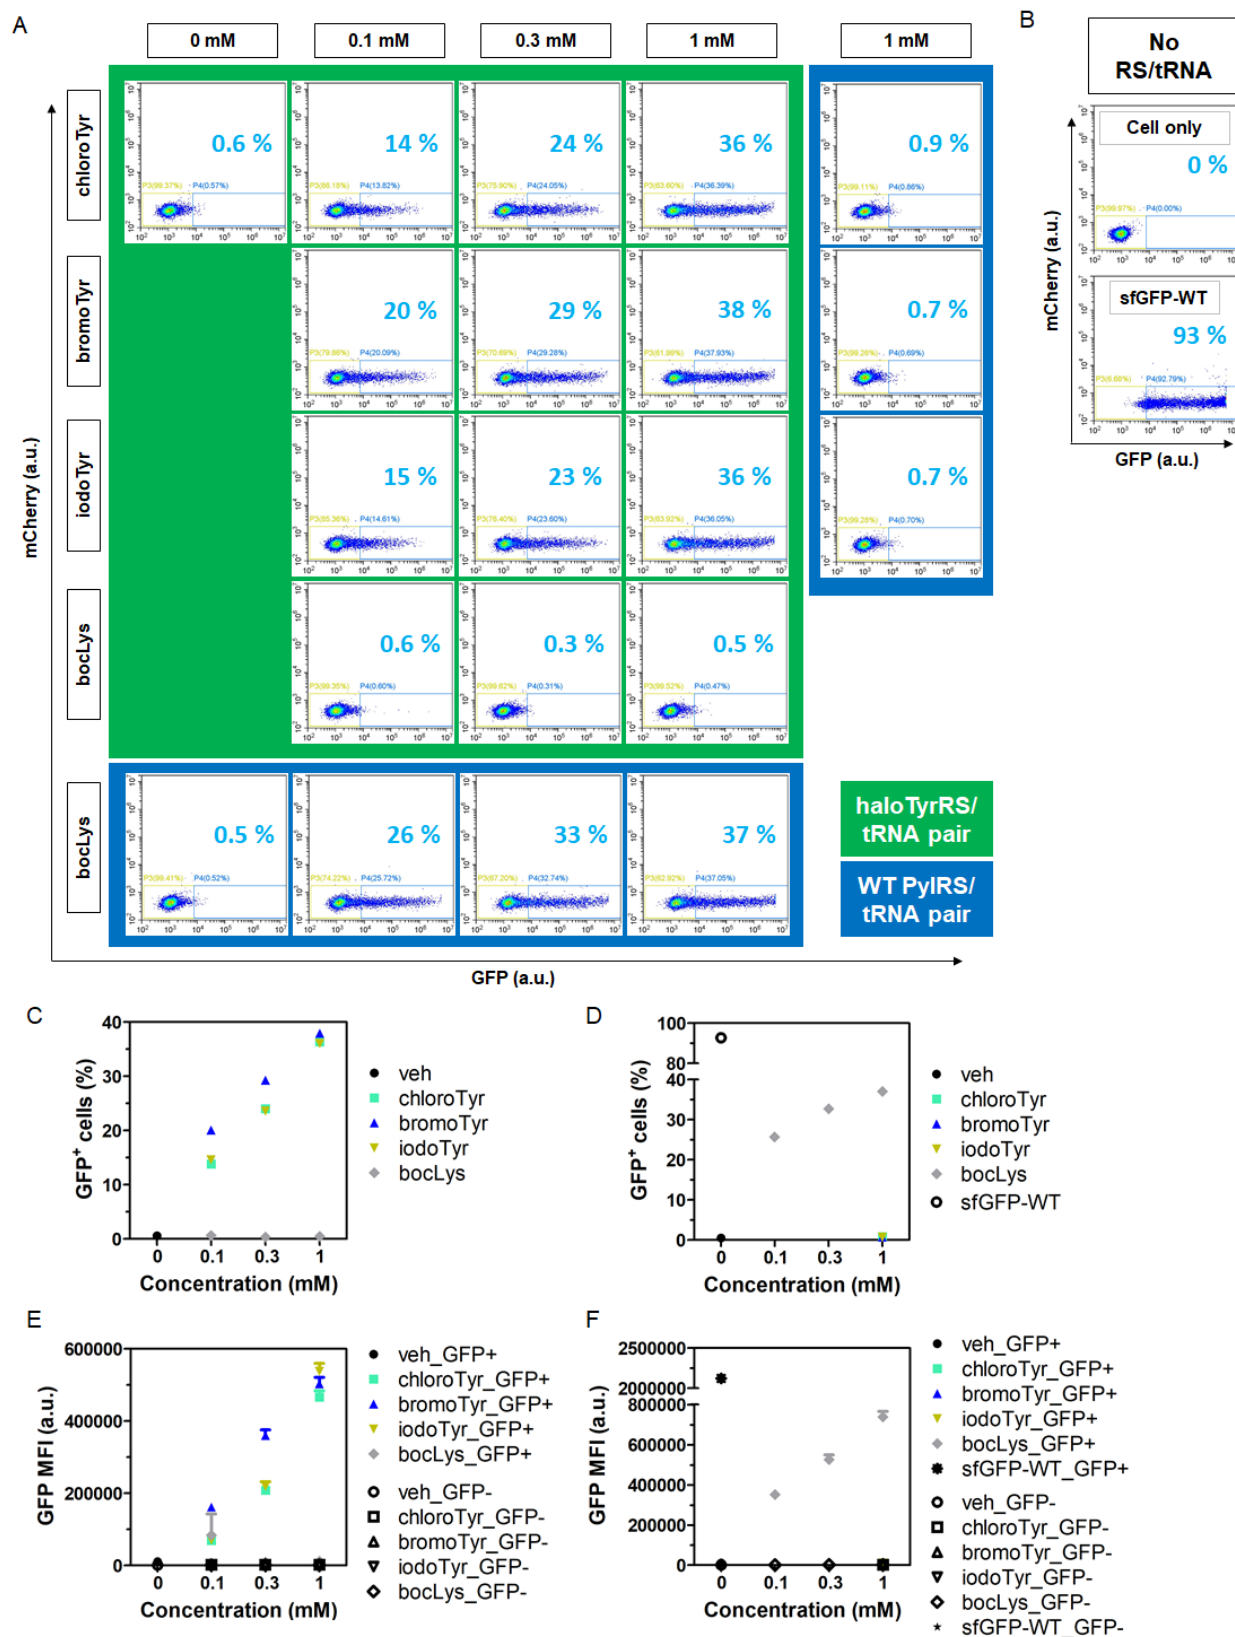

**Figure S9.** Suppression of the TAG mutation using the haloTyrRS in mammalian cells. HEK293T cells were transfected for 24 h with pAcBac1-haloTyrRS and pAcBac1-sfGFP-150TAG (A, green panel), or pAcBac1-WT pylRS and pAcBac1-sfGFP-150TAG (A, blue panel) followed by flow cytometry analysis. The cells without any transfection (cell only) and sfGFP-WT were used as a negative and positive control, respectively (B). The percentage numbers in blue in panels A and B indicate the percentage ratio of the GFP expressing cells. The percentage of the GFP expressing cells were plotted for the haloTyrRS/tRNA pair (C) and the WT pylRS/tRNA pair (D). The MFI of the GFP expressing (GFP+) and the GFP non-expressing cells (GFP-) is shown for the haloTyrRS/tRNA pair (E) and the WT pylRS/tRNA pair (F).

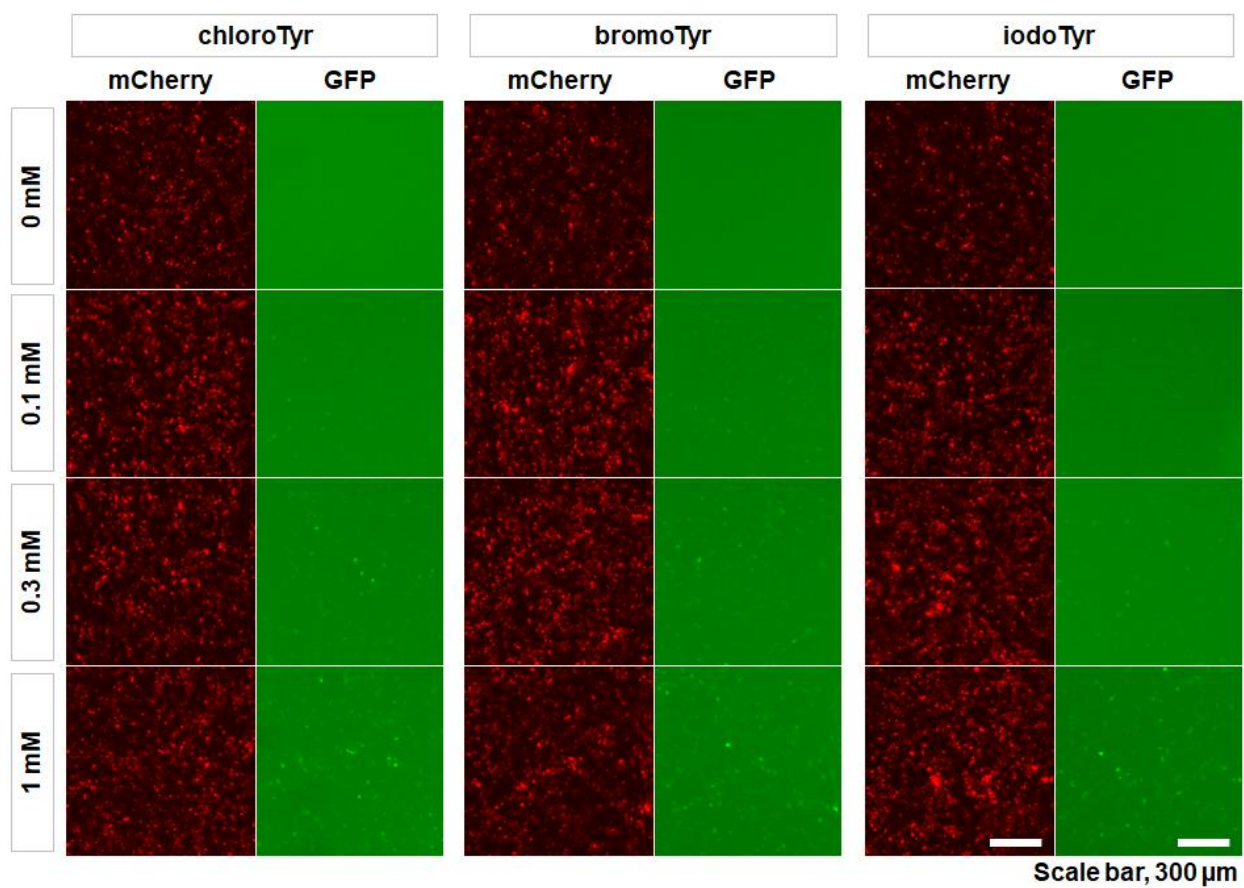

**Figure S10.** Suppression of the TAG mutation on the fluorescent reporter. HEK293T cells expressing *mCherry-TAG-EGFP-HA* and the haloTyrRS/tRNA pair in the presence or absence of haloTyr were subjected to epifluorescence microscopy at 24 h after transfection. Scale bar, 300  $\mu$ m

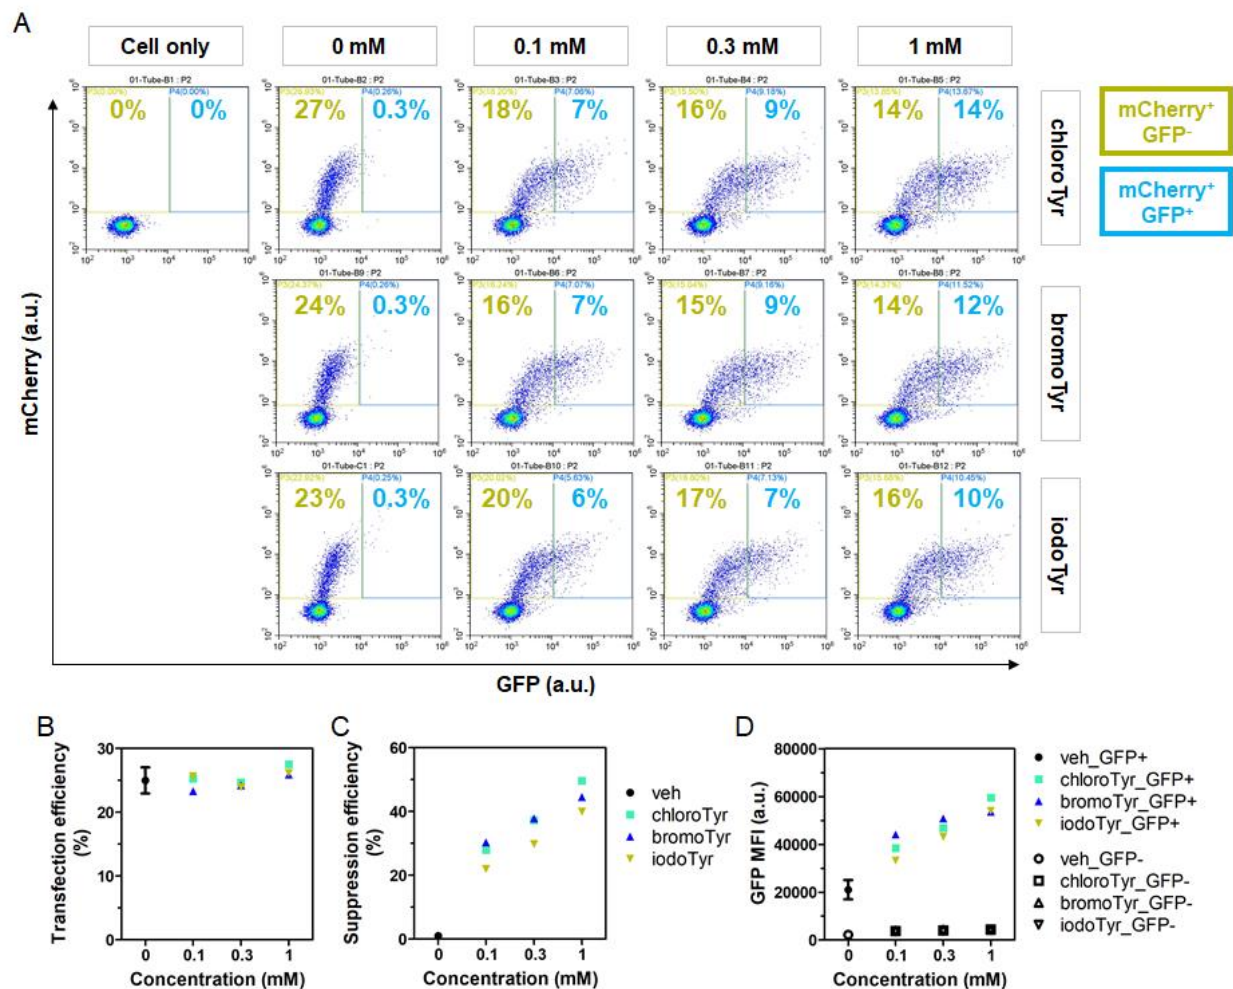

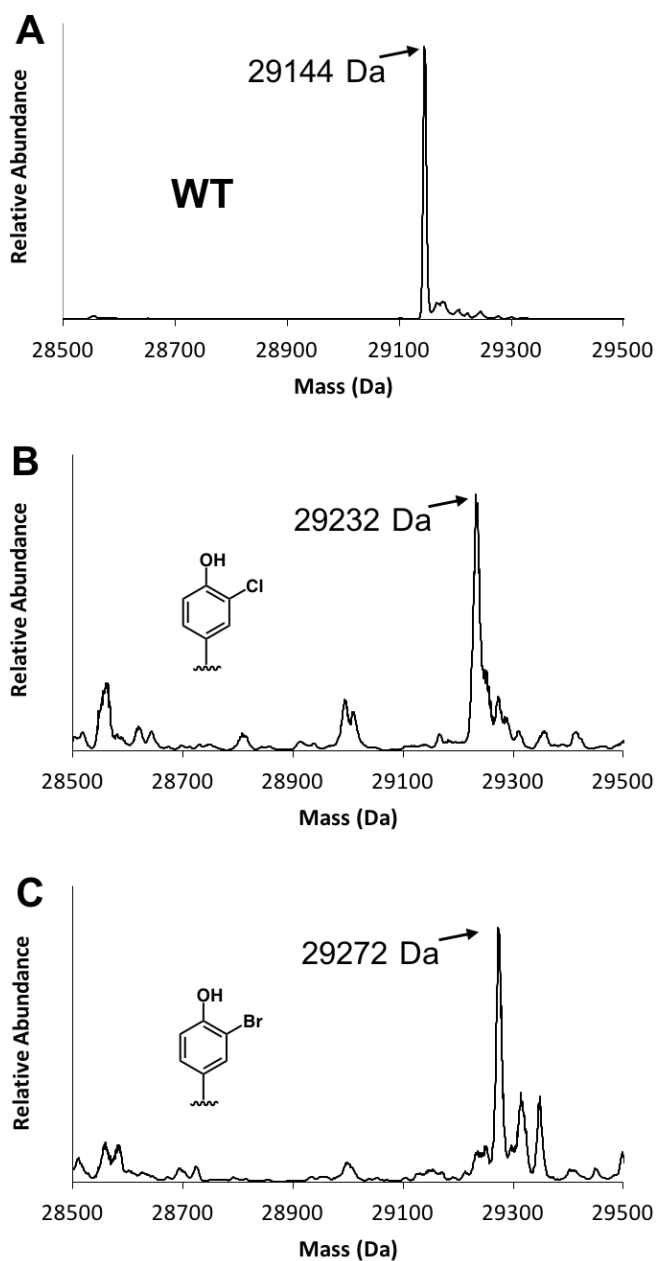

**Figure S12.** ESI-MS spectra of purified sfGFP expressed in HEK293T cells (A) ESI-MS spectra of wild-type GFP, (B) ESI-MS spectra of sfGFP-150-3-chloroTyr, and (C) ESI-MS spectra of sfGFP-150-3-bromoTyr.

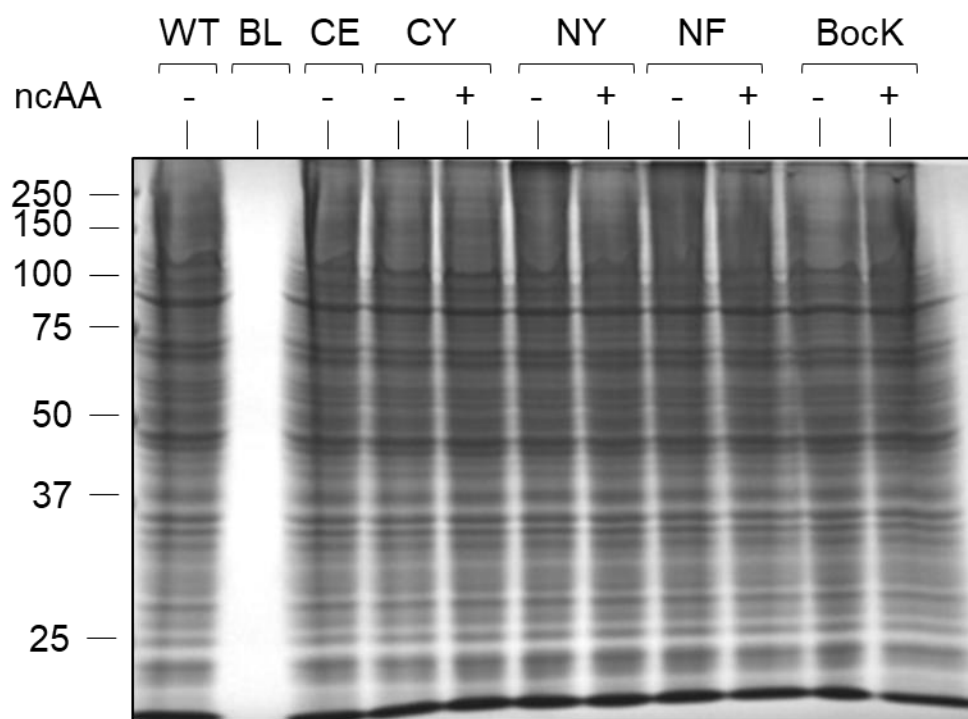

**Figure S13.** Coomassie Blue stained SDS-PAGE gel for Figure 8. To show even loading of the samples, the gel was stained with Coomassie Brilliant Blue R-250 and destained before imaging.



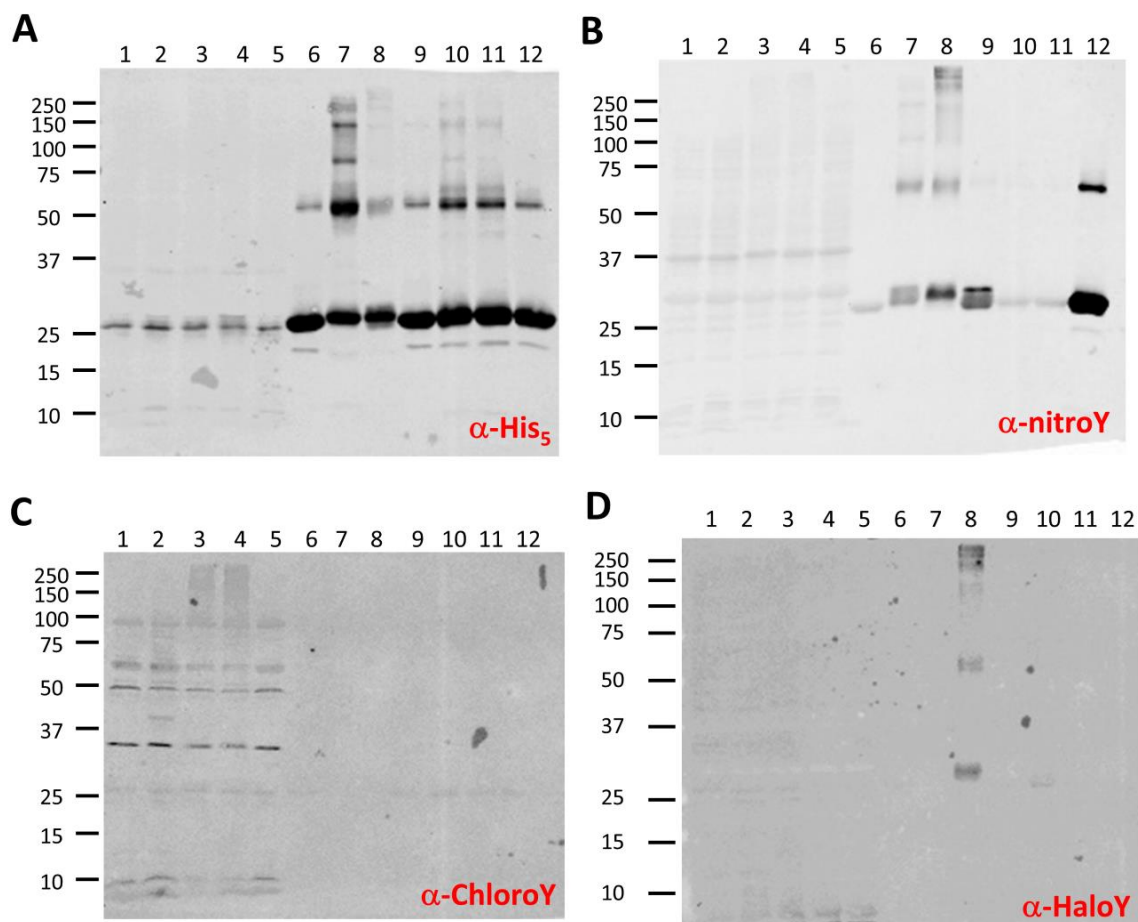

**Figure S14.** Evaluation of halotyrosine antibodies for detecting halotyrosine containing proteins in Western blot analysis. Immunoblots were probed with (A) anti-His<sub>5</sub> antibody, (B) anti-nitroTyr antibody, (C) anti-chloroTyr antibody, and (D) anti-haloTyr antibody. Lane 1: *E. coli* cell free extract (CFE) from cells expressing His<sub>6</sub>-tagged wild-type ApoA1 protein. Lane 2: same as 1 except expression performed in the presence of 1 mM 3-chloroTyr. Lanes 3-5: Same as lane 1 except CFE was treated with 1 mM HOCl, HOBr, and ONOO<sup>-</sup>, respectively, prior to electrophoresis. Lane 6: wild-type His<sub>6</sub>-tagged sfGFP. Lanes 7-9: same as 6 except purified sfGFP was treated with 0.2 mM HOCl, HOBr, and ONOO<sup>-</sup>, respectively, prior to electrophoresis. Lanes 10-12: His<sub>6</sub>-tagged sfGFP with 3-chloroTyr, 3-bromoTyr, and 3-nitroTyr incorporated at position 150.

## Halotyrosine GCE machinery system sequences

*DNA sequences of components used for expression of halotyrosine-containing protein in HEK cells.*

### (A) sfGFP-150TAG

ATGGTTTCTAAAGGTGAAGAACTTTTACtGGCGTTGTGCCGATTCTGGTGGAACTGG  
ATGGTGATGTGAATGGCCATAAATTTAGCGTTCGTGGCGAAGGCCGAAGGTGATGCGA  
CCAACGGTAAACTGACCCTGAAATTTATTTGCACCACCGGTAAACTGCCGGTTCCGT  
GGCCGACCCTGGTGACCACCCTGACCTATGGCGTTCAGTGCTTTAGCCGCTATCCGG  
ATCATATGAAACGCCATGATTTCTTTAAAAGCGCGATGCCGGAAGGCTATGTGCAGG  
AACGTACCATTAGCTTCAAAGATGATGGCACCTATAAAACCCGTGCGGAAGTTAAAT  
TTGAAGGCGATACCCTGGTGAACCGCATTGAACTGAAAGGTATTGATTTTAAAGAAG  
ATGGCAACATTCTGGGTCATAAACTGGAATATAATTTCAACAGCCAT~~***tag***~~GTGTATATT  
ACCGCCGATAAACAGAAAAATGGCATCAAAGCGAACTTTAAATCCGTCACAACGT  
GGAAGATGGTAGCGTGACGCTGGCGGATCATTATCAGCAGAATACCCCGATTGGTGA  
TGGCCCGGTGCTGCTGCCGATAATCATTATCTGAGCACCCAGAGCGTTCTGAGCAA  
AGATCCGAATGAAAAACGTGATCATATGGTGCTGCTGGAATTTGTTACCGCCGCGGG  
CATTACCCACGGTATGGATGAACTTTATAAAGGTTCTGGAAAGCCGATTCCAAATCC  
CCTGTTGGGACTGGATTCTACTCATCACCACCATCACCAC

sfGFP-150TAG (the TAG codon is indicated as underlined bold italic letters)

V5 tag

6xHis tag

### (B) HaloTyrRS

ATGGCGTGTCGGTTCCCTTTGCAGTTGCCTCCACTGGAGCGCCTCACACTCGAC  
AAGGACAAGAAACCCCTGGACGTGCTGATCAGCGCCACCGGCCTGTGGATGAGCCG  
GACCGGCACCCTGCACAAGATCAAGCACACGAGGTGTCAAGAAGCAAAATCTACA  
TCGAGATGGCCTGCGGCGACCACCTGGTGGTGAACAACAGCAGAAGCTGCCGGACC  
GCCAGAGCCTTCCGGCACCAACAAGTACAGAAAGACCTGCAAGCGGTGCCGGGTGTC  
CGACGAGGACATCAACAACCTTTCTGACCAGAAGCACCGAGAGCAAGAACAGCGTGA  
AAGTGCGGGTGGTGTCCGCCCCCAAAGTGAAGAAAGCCATGCCCAAGAGCGTGTCC  
AGAGCCCCCAAGCCCCTGGAAAACAGCGTGTCCGCCAAGGCCAGCACCAACACCAG  
CCGCAGCGTGCCCAGCCCCGCCAAGAGCACCCCCAACAGCTCCGTGCCCGCCTCTGC  
TCCTGCTCCCAGCCTGACACGGTCCCAGCTGGACAGAGTGGAGGCCCTGCTGTCCCC  
CGAGGACAAGATCAGCCTGAACATGGCCAAGCCCTTCCGGGAGCTGGAACCCGAGC  
TGGTGACCCGGCGGAAGAACGACTTCCAGCGGCTGTACACCAACGACCGGGAGGAC  
TACCTGGGCAAGCTGGAACGGGACATCACCAAGTTCTTCGTGGACCGGGGCTTCCTG  
GAAATCAAGAGCCCCATCCTGATCCCCGCCGAGTACGTGGAGCGGATGGGCATCAA  
CAACGACACCGAGCTGTCCAAGCAGATTTTCCGGGTGGACAAGAAcctgtgcctgcggcctAC  
CctggccccaccTCACTCaactacctgcggaaactggacagaatcctgcctggccccatcaagatttcgaagtgggacctgtac  
cggaaagagagcgacggcaaagagcacctggaagagttacaatggtgGGTtttACCcagatgggcagcggtgcACCCGGG  
AGAACCTGGAAGCCCTGATCAAAGAGTTCCTGGATTACCTGGAAATCGACTTCGAGA  
TCGTGGGCGACAGCTGCATGGTGTACGGCGACACCCTGGACATCATGCACGGCGACC  
TGGAAGTGAAGCAGCGCCGTGGTGGGACCCGTGTCCCTGGACCGGGAGTGGGGCATC  
GACAAGCCCTGGATCGGAGCCGGCTTCGGCCTGGAACGGCTGCTGAAAGTGATGCA

CGGCTTCAAGAACATCAAGCGGGCCAGCAGAAGCGAGAGCTACTACAACGGCATCA  
GCACCAACCTGTGATGA

N-terminal nuclear export signal (bold and underlined)

Active site mutations as compared to WT Mb PylRS (italics and underlined)
